# Supplementary material for: MicroRNA-223-3p inhibits vascular calcification and the osteogenic switch of vascular smooth muscle cells
Source: PubMed Central journal article supplement — J Biol Chem. 2021 Feb 26;296:100483. doi: 10.1016/j.jbc.2021.100483 (PMC8039724; doi:10.1016/j.jbc.2021.100483), 2021-02-26
Supplement: mmc1.pdf [file mmc1.pdf]

## MicroRNA-223-3p inhibits vascular calcification and the osteogenic switch of vascular smooth muscle cells

Yingchun Han<sup>1</sup>, Jichao Zhang<sup>1</sup>, Shan Huang<sup>1,2</sup>, Naixuan Cheng<sup>1,2</sup>, Congcong Zhang<sup>1</sup>, Yulin Li<sup>1</sup>, Xiaonan Wang<sup>3</sup>, Jinghua Liu<sup>1</sup>, Bin You<sup>1</sup>, Jie Du<sup>4</sup>

1 Beijing Anzhen Hospital, Affiliated to Capital Medical University, Beijing Institute of Heart, Lung and Blood Vessel Diseases, Beijing, China.

2 School of Basic Medical Sciences, Capital Medical University, Beijing, China.

3 Renal Division, Department of Medicine, Emory University, Atlanta, Georgia, USA.

4 Beijing Anzhen Hospital, Affiliated to Capital Medical University, Beijing Institute of Heart, Lung and Blood Vessel Diseases, Beijing, China jiedu@ccmu.edu.cn

\*Corresponding author: Jie Du

E-mail: jiedu@ccmu.edu.cn

**Running title:** MiR-223-3p inhibits vascular calcification in mice

**Keywords:** vascular smooth muscle cell; interleukin-6 (IL-6); signal transducer and activator of transcription 3 (STAT3); osteogenic phenotype; vascular calcification; miR-223-3p; epigenetics.

### Supporting Information

**Figure S1.** Representative Alizarin Red S and HE staining of the aortic roots and BCAs of WT and aged ApoE<sup>-/-</sup> mice.

**Figure S2.** Representative Oil Red O staining (**A**) and quantification (**B**) in the aortic roots of aged ApoE<sup>-/-</sup> and DKO mice. Data are expressed as the mean  $\pm$  SD. \*\* $P < 0.01$  by unpaired two-tailed Student's *t*-test

**Figure S3.** MiR-223-3p level in VSMCs(A), MOVAS(B) and 3T3 cells(C) detected by RT-PCR 24 h after transfection with Ctrl mimics or miR-223-3p (100nM). Data are expressed as the mean  $\pm$  SD. \*\*\* $P < 0.001$  by unpaired two-tailed Student's *t*-test.

**Figure S4.** A. Representative western blotting of STAT3 in VSMCs 48h after transfection with 50nM Ctrl siRNA (si-Ctrl) or STAT3 siRNA (si-Stat3) cultured with mIL-6/sIL-6R complex (50ng/mL). B. Total calcium content in VSMCs transfected with si-Ctrl or si-STAT3 cultured in OIM with PBS or mIL-6/sIL-6R complex (50ng/mL) for 14 d ( $n=3$ ). \* $P < 0.05$ , \*\* $P < 0.01$  compared with PBS group, # $P < 0.05$  compared with by mIL-6/sIL-6R + si-Ctrl group unpaired two-tailed Student's *t*-test.

**Figure S1**

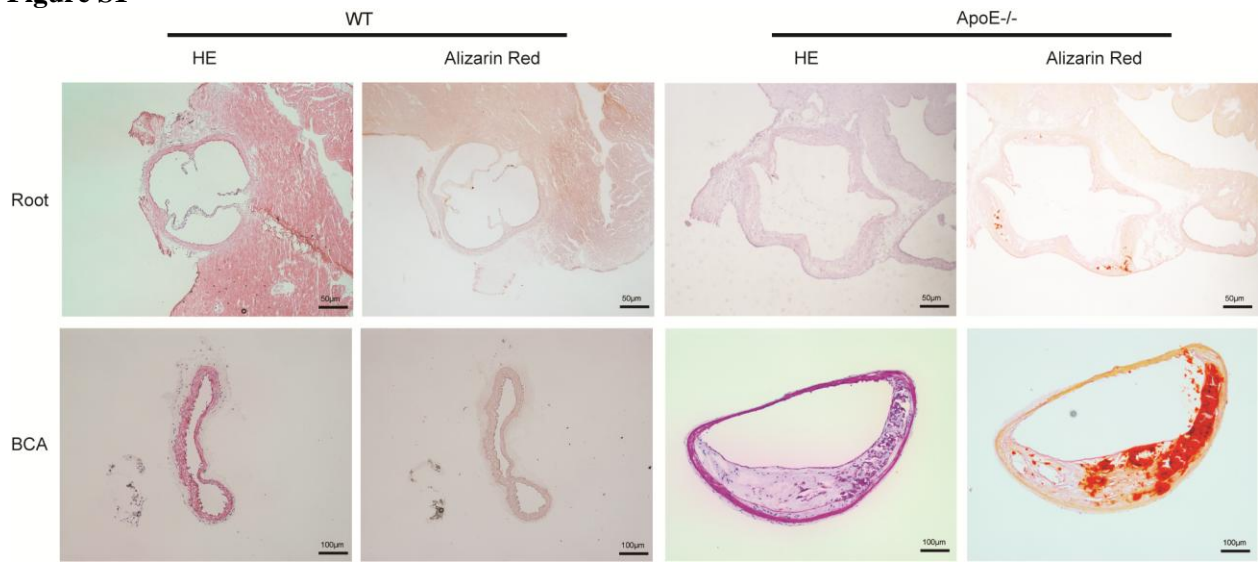

**Figure S2**

**A**

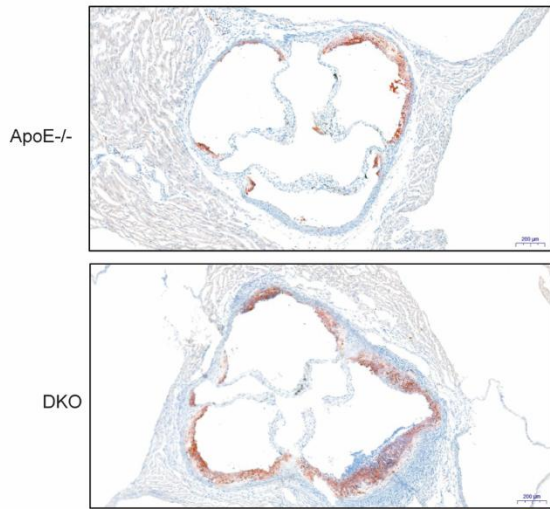

**B**

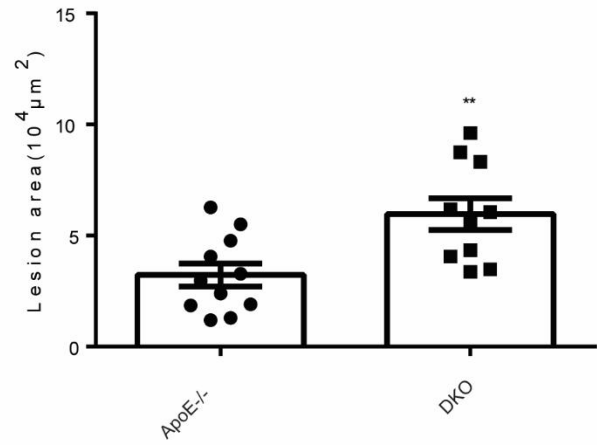

**Figure S3**

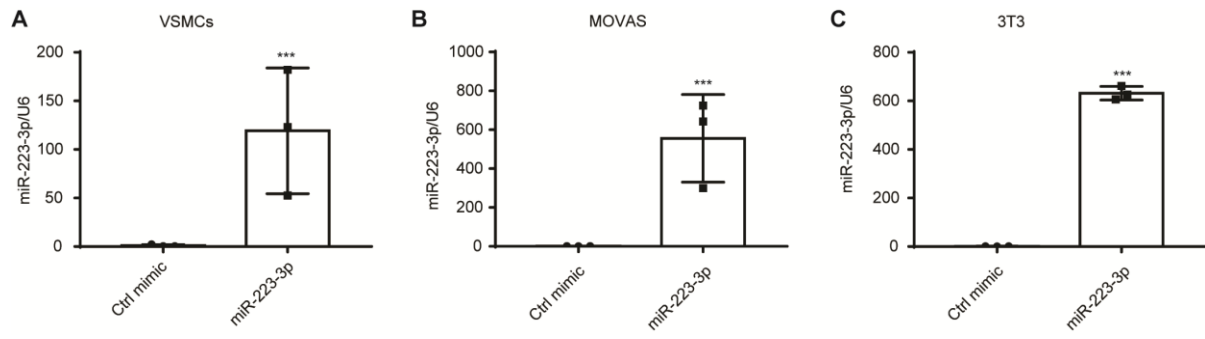

**Figure S4**

**A**

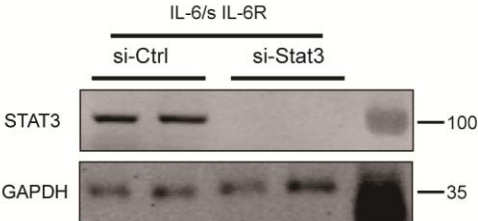

**B**

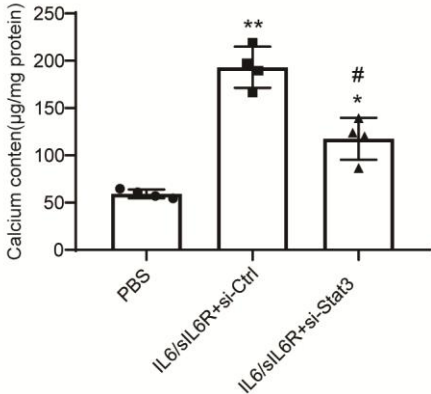

**Supplemental Table 1**

Table S1 Up and down regulated miRNA(FC>1.5 or FC<0.67, P-value<0.01)

| Symbol           | TPM (Transcripts Per Million) |         |          |          | FC       | Log2FC   | P-value  | up/<br>down |
|------------------|-------------------------------|---------|----------|----------|----------|----------|----------|-------------|
|                  | CKD1                          | CKD2    | Ctrl1    | Ctrl2    |          |          |          |             |
| mmu-miR-486-5p   | 7809                          | 54409   | 1347     | 3571     | 4.931929 | 2.302152 | 0.005089 | up          |
| mmu-miR-708-5p   | 1130                          | 548     | 91       | 165      | 2.308931 | 1.207225 | 0.004568 | up          |
| mmu-miR-139-5p   | 948                           | 669     | 93       | 182      | 2.108748 | 1.076387 | 0.006727 | up          |
| mmu-miR-29b-3p   | 8292                          | 6041    | 1023     | 1469     | 2.014048 | 1.010098 | 0.000165 | up          |
| mmu-miR-224-5p   | 19670                         | 19734   | 3174     | 4365     | 1.843375 | 0.88235  | 0.000123 | up          |
| mmu-miR-223-3p   | 2571                          | 3243    | 449      | 695      | 1.823771 | 0.866925 | 0.00735  | up          |
| mmu-miR-221-3p   | 23812                         | 23046   | 3906     | 5485     | 1.760691 | 0.816142 | 0.000306 | up          |
| mmu-miR-29a-3p   | 364038                        | 266464  | 56603    | 72345    | 1.696042 | 0.762172 | 3.50E-05 | up          |
| mmu-miR-214-3p   | 22521                         | 15807   | 3464     | 4641     | 1.644455 | 0.71761  | 0.001686 | up          |
| mmu-miR-21a-5p   | 245048                        | 301972  | 50375    | 68933    | 1.627499 | 0.702656 | 0.000224 | up          |
| mmu-miR-145a-5p  | 1191694                       | 1261500 | 585527   | 797366   | 0.626268 | -0.67515 | 0.001792 | down        |
| mmu-miR-101a-3p  | 35100                         | 30096   | 16411    | 20009    | 0.621783 | -0.68552 | 0.004563 | down        |
| mmu-let-7i-5p    | 102833                        | 111059  | 53827    | 70128    | 0.60736  | -0.71938 | 0.001173 | down        |
| mmu-miR-148a-3p  | 61781                         | 53222   | 28620    | 44385    | 0.558224 | -0.84108 | 0.000114 | down        |
| mmu-miR-28a-3p   | 1430                          | 1365    | 883      | 1110     | 0.490119 | -1.0288  | 0.001511 | down        |
| mmu-miR-423-3p   | 1568                          | 1410    | 914      | 1292     | 0.475438 | -1.07267 | 0.00066  | down        |
| mmu-miR-299a-3p  | 299                           | 267     | 182      | 250      | 0.460233 | -1.11957 | 0.006718 | down        |
| mmu-miR-199b-5p  | 6122                          | 6116    | 4352     | 6007     | 0.416725 | -1.26283 | 3.48E-06 | down        |
| mmu-miR-140-3p   | 637443                        | 508006  | 440095   | 519111   | 0.412631 | -1.27708 | 1.43E-06 | down        |
| mmu-miR-30c-2-3p | 574                           | 488     | 415      | 683      | 0.344254 | -1.53846 | 9.02E-06 | down        |
| mmu-miR-381-3p   | 531                           | 490     | 490      | 582      | 0.330915 | -1.59547 | 1.08E-05 | down        |
| mmu-miR-196b-5p  | 192                           | 196     | 208      | 204      | 0.323147 | -1.62974 | 0.000283 | down        |
| mmu-let-7i-3p    | 318                           | 301     | 354      | 390      | 0.287515 | -1.79829 | 4.78E-06 | down        |
| mmu-miR-143-3p   | 7212255                       | 6793865 | 13984725 | 12239910 | 0.181072 | -2.46537 | 4.83E-07 | down        |
| mmu-miR-5099     | 300                           | 279     | 596      | 662      | 0.159066 | -2.6523  | 1.22E-12 | down        |
| mmu-miR-196a-5p  | 43                            | 38      | 99       | 86       | 0.148033 | -2.75601 | 2.92E-06 | down        |

**Supplemental Table 2**

| Gene         |   | Primer                  |
|--------------|---|-------------------------|
| <i>Il6</i>   | F | GGGAAATCGTGGAATGAGA     |
|              | R | TTCTGCAAGTGCATCATCGT    |
| <i>Il6r</i>  | F | CCTGAGACTCAAGCAGAAATGG  |
|              | R | AGAAGGAAGGTCGGCTTCAGT   |
| <i>Stat3</i> | F | CAATACCATTGACCTGCCGAT   |
|              | R | GAGCGACTCAAAC TGCCCT    |
| <i>Alp</i>   | F | CCA ACTCTTTTGTGCCAGAGA  |
|              | R | GGCTACATTGGTGTTGAGCTTTT |
| <i>Ocn</i>   | F | AGCAGAGTGAGCAGAAAGATG   |
|              | R | GAACAGACAAGTCCCACACAG   |
| <i>Runx2</i> | F | CCGTCCACTGTCACTTTAATAGC |
|              | R | GTAGCCAGGTTCAACGATCTG   |
| <i>Gapdh</i> | F | AATGCATCCTGCACCACC      |
|              | R | ATGCCAGTGAGCTTCCCG      |
